# Supplementary material for: The jaw is a second-class lever in Pedetes capensis (Rodentia: Pedetidae)
Source: PubMed Central journal article supplement (PMC5581530; doi:10.7717/peerj.3741), 2017-08-30
Supplement: peerj-05-3741-s001.pdf [file peerj-05-3741-s001.pdf]

**Table S1. Landmark descriptions.** Landmark numbers correspond to Figure 2. Landmarks 11-28 recorded on both sides of the skull.

| #  | Landmark description                                                                  |
|----|---------------------------------------------------------------------------------------|
| 1  | Antermost point on internasal suture                                                  |
| 2  | Midpoint on dorsal cranium between anterior roots of zygomatic arches                 |
| 3  | Midsagittal point between anterior margins of ascending processes of zygomatic arches |
| 4  | Midpoint on dorsal cranium between zygomatic processes of squamosal bones             |
| 5  | Posteriormost point on dorsal midline                                                 |
| 6  | Midpoint between ventral margins of incisor alveoli                                   |
| 7  | Midpoint between anterior margins of premolars                                        |
| 8  | Posteriormost midline point on palate                                                 |
| 9  | Midpoint between posterior margins of pterygoid flanges                               |
| 10 | Ventral midline point on margin of foramen magnum                                     |
| 11 | Dorsalmost point on incisal alveolar margin                                           |
| 12 | Antermost point on naso-frontal suture                                                |
| 13 | Antermost point on dorsal margin of anterior zygomatic root                           |
| 14 | Premaxillo-maxillary suture on lingual incisal margin in infraorbital fossa           |
| 15 | Anterior extremity of masseteric fossa on zygomatic arch                              |
| 16 | Dorsalmost extremity of infraorbital fossa                                            |
| 17 | Lingual margin of incisor on posterior border of infraorbital fossa                   |
| 18 | Lacrimo-jugal suture on anterior orbital margin                                       |
| 19 | Dorsalmost point on margin of masseteric fossa on zygomatic arch                      |
| 20 | Lacrimo-frontal suture on anterior orbital margin                                     |
| 21 | Foramen on lacrimo-frontal suture in orbital wall                                     |
| 22 | Notch between dorsal process of maxilla in anterior orbital wall and M2 alveolus      |
| 23 | Antermost point on margin of optic foramen                                            |
| 24 | Anterior extremity of fossa for insertion of posterior masseter on zygomatic arch     |
| 25 | Medialmost point on dorsal orbital margin                                             |
| 26 | Jugo-squamosal suture on dorsal margin of zygomatic arch                              |
| 27 | Posteriormost point on medial margin of zygomatic process of the squamosal            |
| 28 | Posteriormost point on dorsal orbital margin                                          |
